# Supplementary material for: Continuous chemical characterization of ultrafine particulate matter (PM 0.1 )
Source: Copernicus journal article supplement (doi:10.5194/amt-18-4969-2025), 2025-10-01
Supplement: Supplementary file 1 [file amt-18-4969-2025-supplement.pdf]

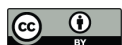

*Supplement of*

## **Continuous chemical characterization of ultrafine particulate matter (PM<sub>0.1</sub>)**

**Georgia A. Argyropoulou et al.**

*Correspondence to:* Spyros N. Pandis ([spyros@chemeng.upatras.gr](mailto:spyros@chemeng.upatras.gr))

The copyright of individual parts of the supplement might differ from the article licence.

## Supplementary Material

**Table S1.** Overview of field blank measurements by Xact625i. As  $n$  is denoted the number of 4-hour blank samples, as SD the standard deviation and as LOD (90%) the limit of detection for 90% confidence level.

|         | Species | Mean (ng m <sup>-3</sup> ) | SD (ng m <sup>-3</sup> ) | LOD (90%) (ng m <sup>-3</sup> ) |
|---------|---------|----------------------------|--------------------------|---------------------------------|
| $n = 4$ | Si      | 35.01                      | 13.71                    | 79.97                           |
|         | S       | 4.25                       | 0.21                     | 4.93                            |
|         | Cl      | 0.80                       | 0.63                     | 2.85                            |
|         | K       | 1.15                       | 0.32                     | 2.19                            |
|         | Ca      | 3.50                       | 0.95                     | 6.60                            |
|         | Ti      | 0.16                       | 0.19                     | 0.78                            |
|         | Fe      | 1.29                       | 0.66                     | 3.45                            |
|         | Zn      | 0.20                       | 0.02                     | 0.26                            |

**Table S2.** Overview of the main results by Xact625i. As  $n$  is denoted the number of 4-hour samples and as SD the standard deviation. For the corrected concentrations the non-zero minima are shown.

| Uncorrected concentrations (ng m <sup>-3</sup> ) |         |       |       |        |      |       | Corrected concentrations (ng m <sup>-3</sup> ) |        |        |       |        |
|--------------------------------------------------|---------|-------|-------|--------|------|-------|------------------------------------------------|--------|--------|-------|--------|
|                                                  | Species | Mean  | SD    | Median | Min  | Max   | Mean                                           | SD     | Median | Min   | Max    |
| $n = 37$                                         | S       | 7.08  | 3.46  | 5.91   | 3.55 | 15.46 | 32.08                                          | 37.86  | 18.48  | 7.05  | 124.58 |
|                                                  | Cl      | 2.00  | 1.31  | 1.60   | 0.55 | 6.09  | 7.19                                           | 15.94  | 0.00   | 27.36 | 58.68  |
|                                                  | K       | 2.91  | 1.93  | 2.76   | 0.54 | 7.58  | 19.63                                          | 20.84  | 17.25  | 12.04 | 71.70  |
|                                                  | Ca      | 15.31 | 11.21 | 13.32  | 1.58 | 48.41 | 130.48                                         | 123.73 | 105.61 | 68.58 | 500.71 |
|                                                  | Ti      | 0.35  | 0.32  | 0.32   | 0.00 | 1.06  | 1.12                                           | 2.91   | 0.00   | 6.13  | 10.02  |
|                                                  | Fe      | 4.04  | 3.17  | 3.68   | 0.40 | 11.88 | 24.62                                          | 31.77  | 0.00   | 24.80 | 118.05 |
|                                                  | Zn      | 0.32  | 0.26  | 0.26   | 0.04 | 1.57  | 1.35                                           | 2.59   | 0.00   | 0.75  | 13.42  |

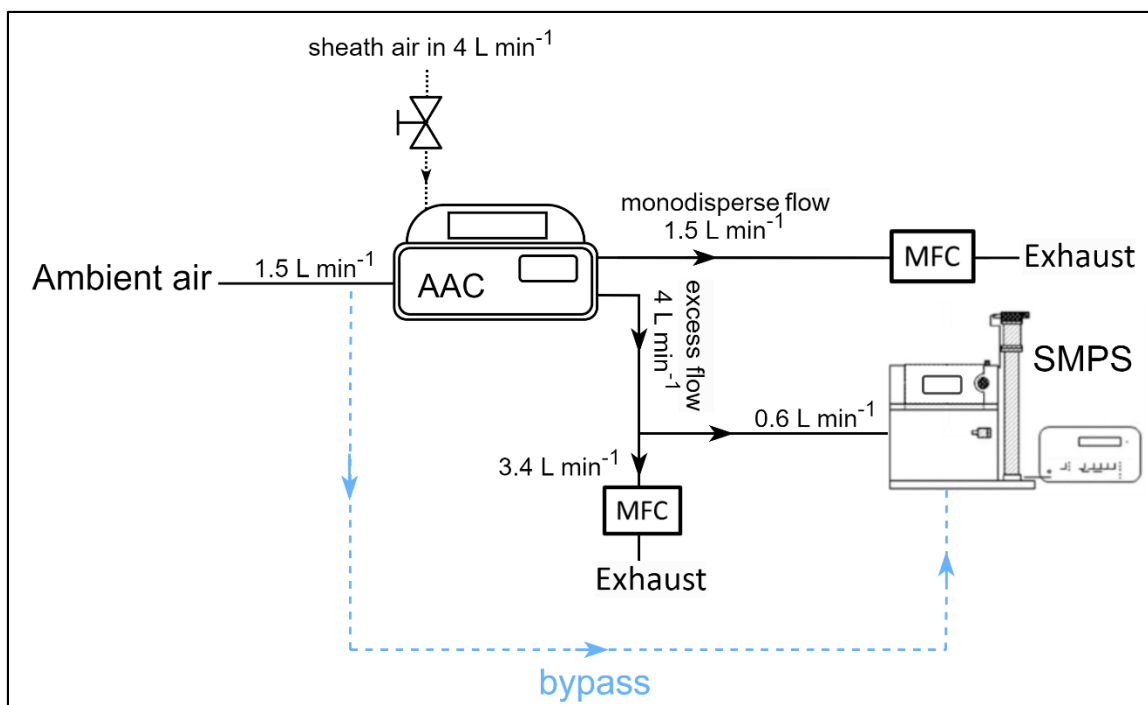

**Figure S1.** Experimental set-up for the testing of the AAC as a  $PM_{0.1}$  cut-off using ambient air. This setup was used to evaluate the system's cut-off sharpness, dilution, and particle losses within the AAC.

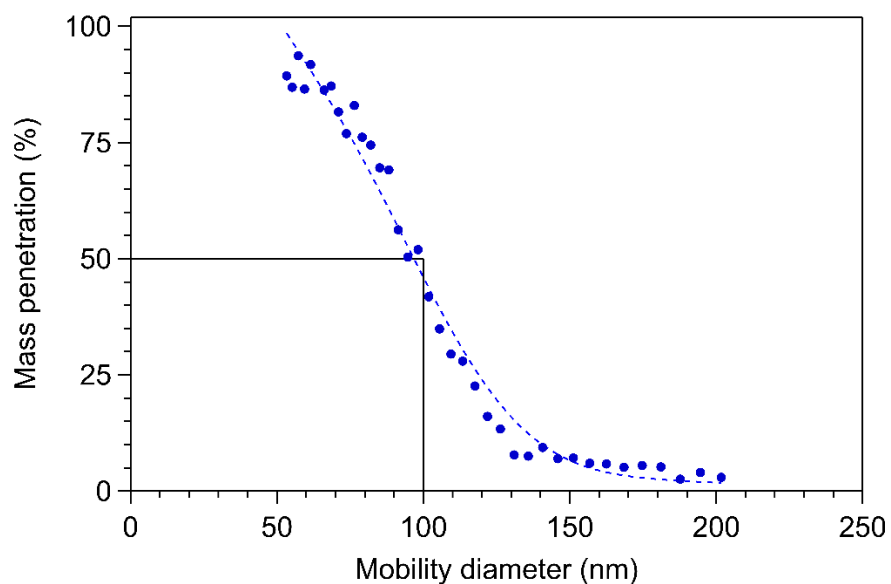

**Figure S2.** Mass penetration percentage of  $PM_{0.1}$  measured by the SMPS for the experimental set-up of Figure S1. The dashed line represents the best-fitting curve. The black lines show that the cut diameter ( $d_{50}$ ), where there is 50% mass penetration, is at 100 nm.

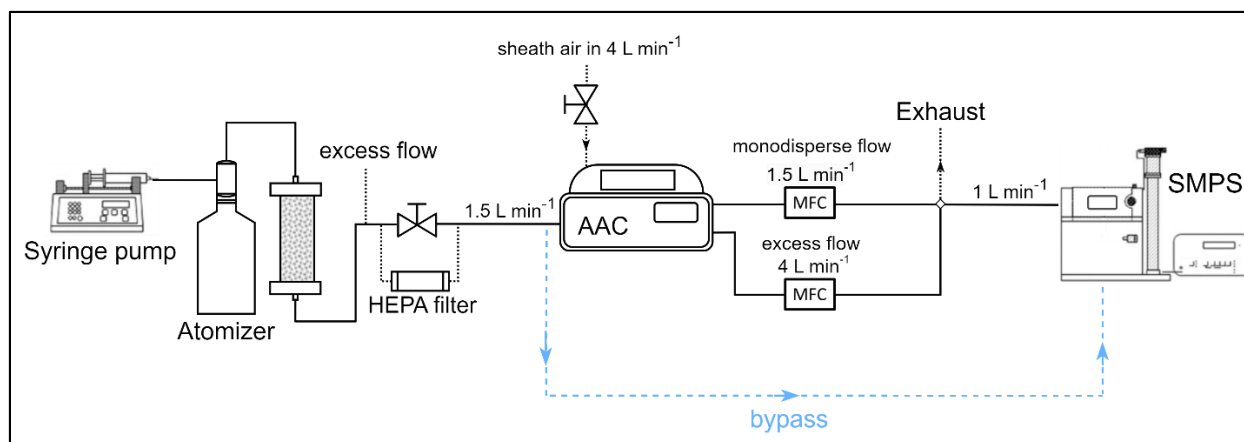

**Figure S3.** Experimental set-up to assess the losses through the MFCs using ammonium sulfate containing particles 5 g L<sup>-1</sup>.

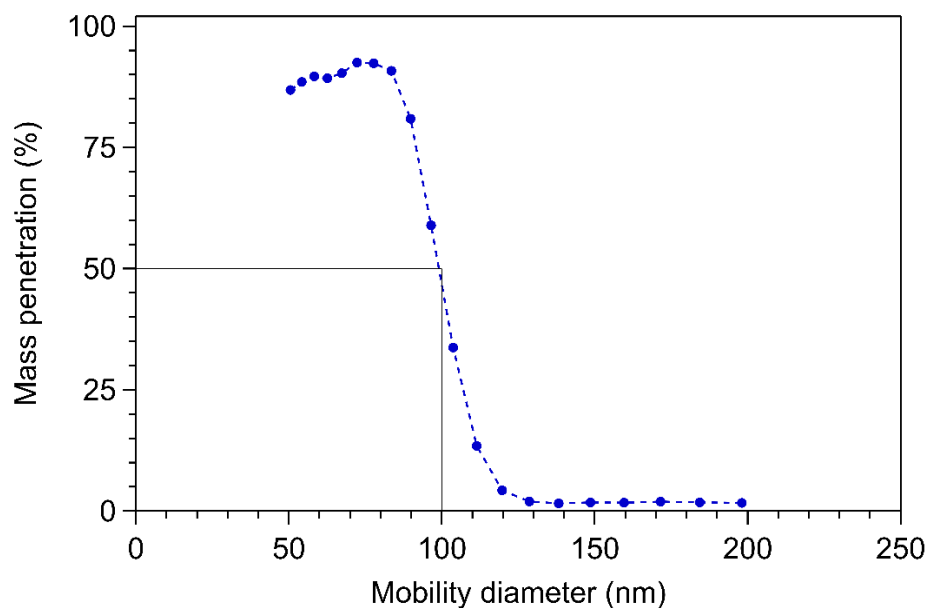

**Figure S4.** Mass penetration percentage of PM<sub>0.1</sub> measured by the SMPS for the experimental set-up of Figure S3. The dashed line represents the best-fitting curve. The black lines show that the cut diameter ( $d_{50}$ ), where there is 50% mass penetration, is at 100 nm.

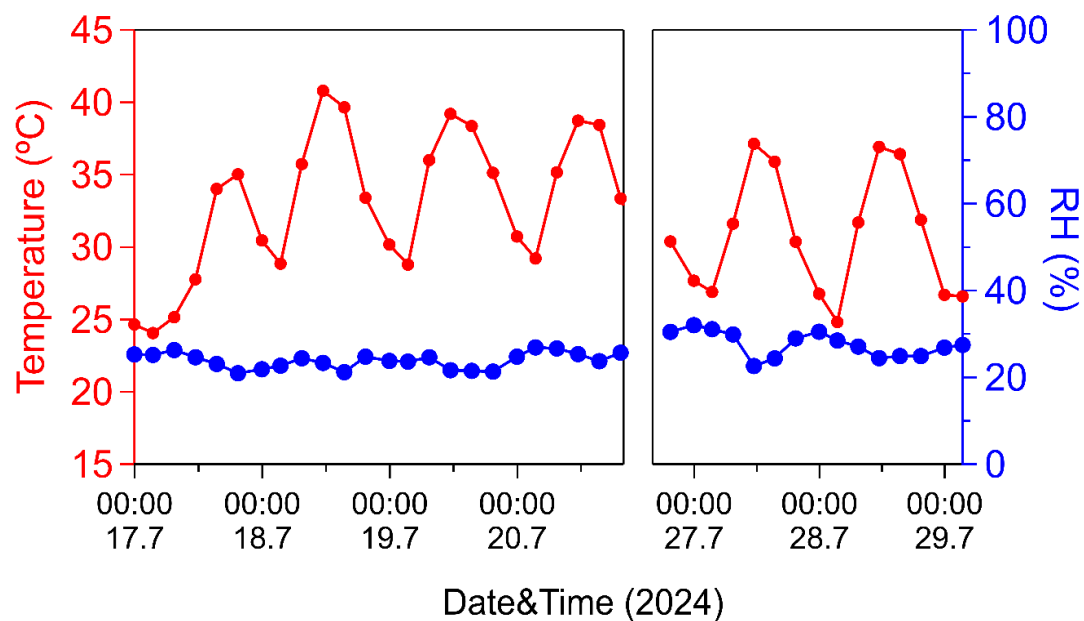

**Figure S5.** Timeseries of ambient temperature (red, left axis) and relative humidity (RH; blue, right axis) as measured by the Xact625i meteorological sensors.

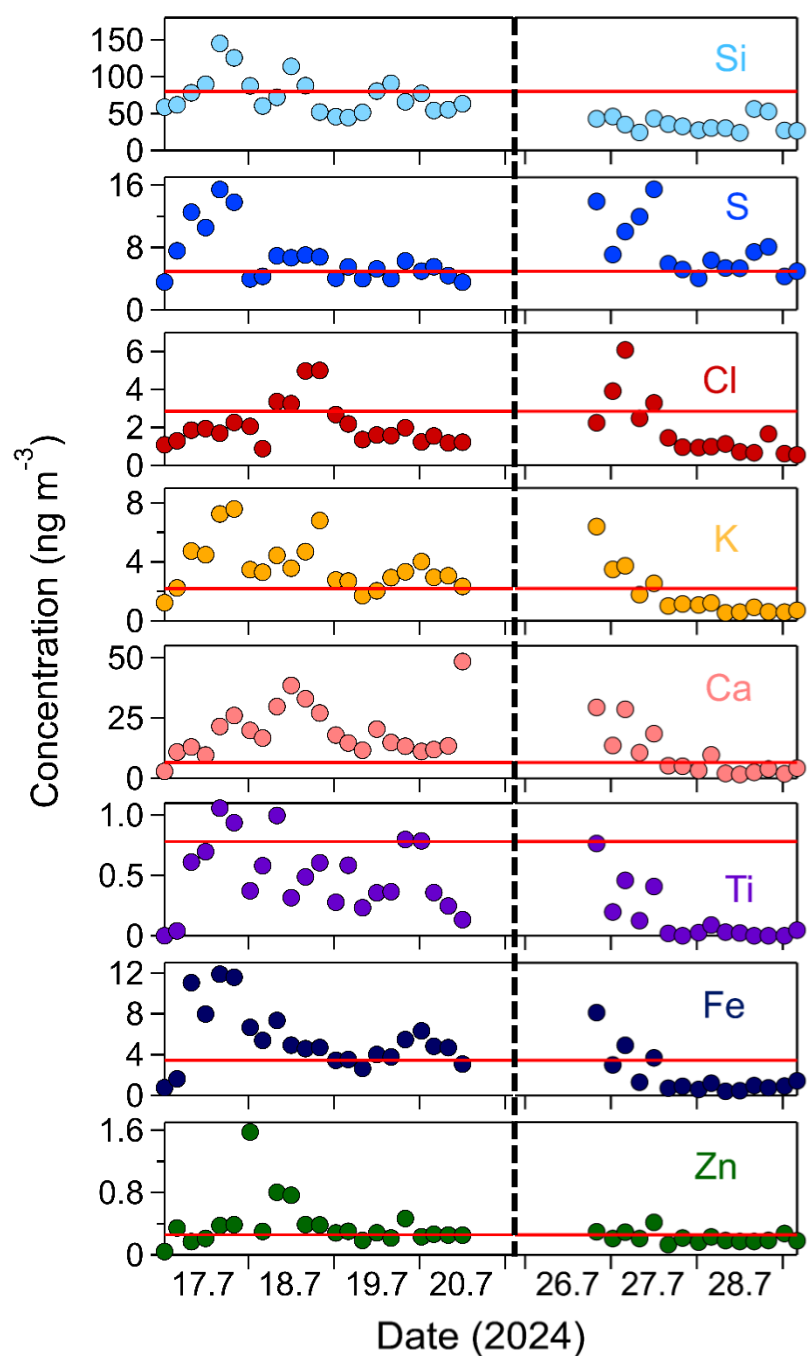

**Figure S6.** Time series of the uncorrected measurements for the elements detected by the Xact625i, in Patras, Greece, from 17 to 29 July 2024. Each point represents a 4-hour sample. The red lines represent the limit of detection of each element for 90% confidence level calculated by Eq. (2), and the vertical dashed line indicates the time gap between the measurements.

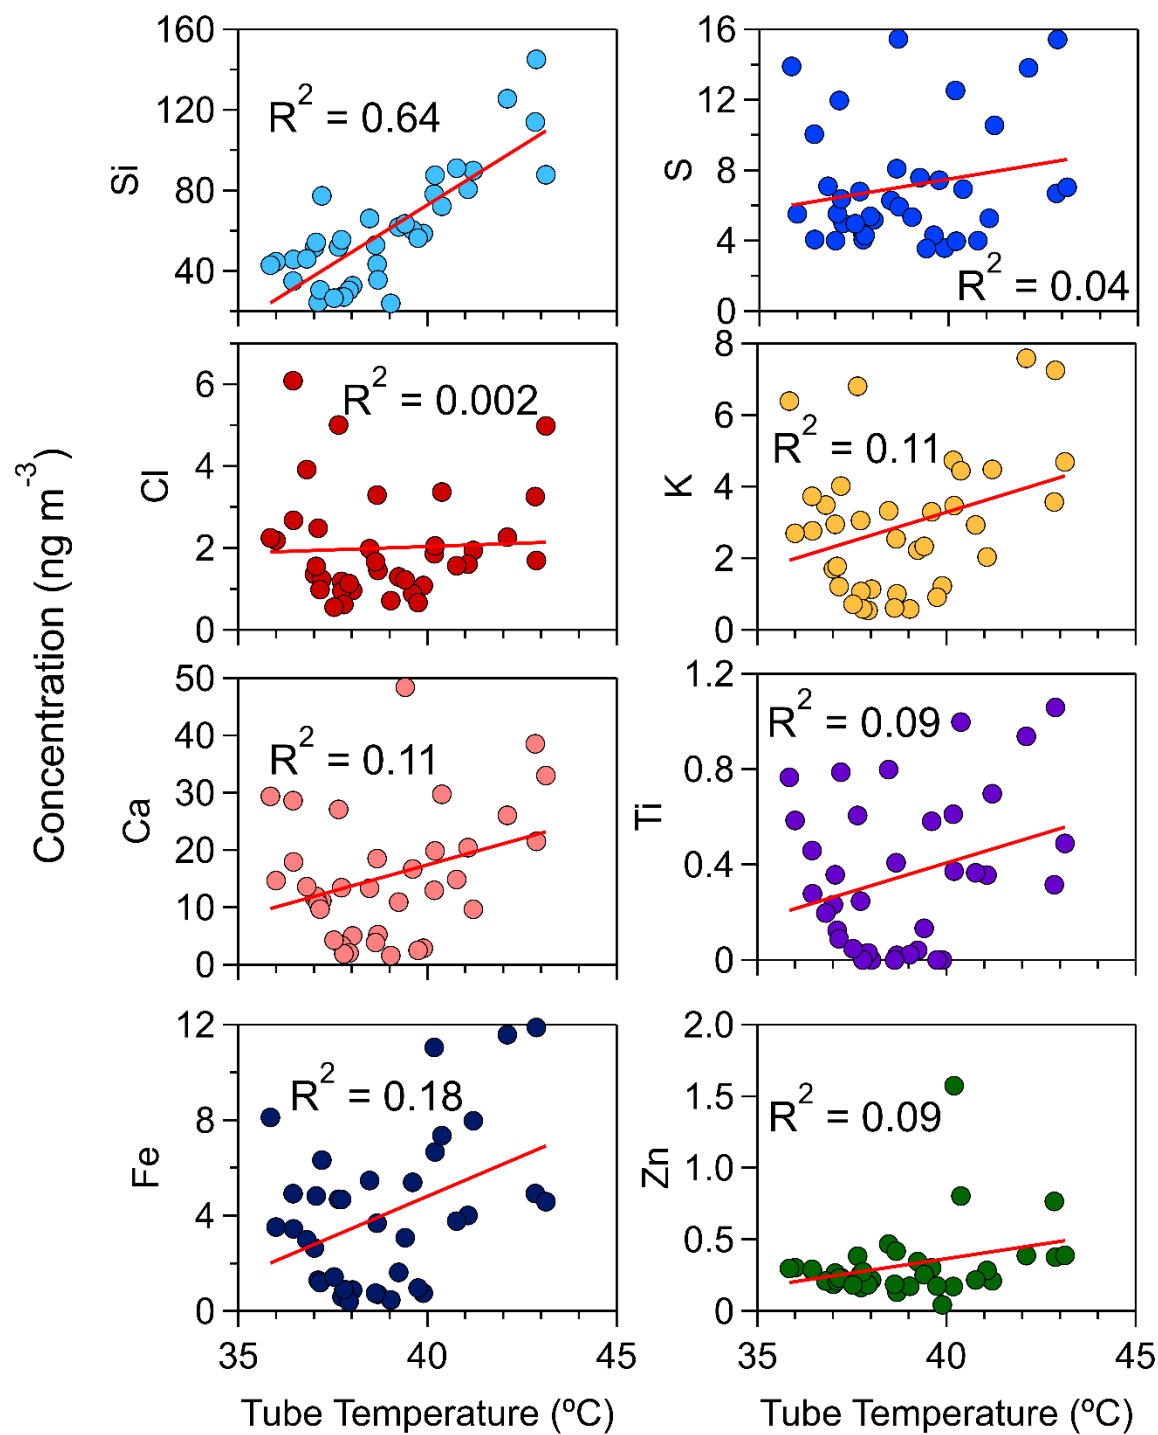

**Figure S7.** Uncorrected concentrations of the elements detected by the Xact625i versus the tube temperature of the Xact625i for the measurements in Patras, Greece, from 17 to 29 July 2024. Each point represents a 4-hour sample. The  $R^2$  is also shown.

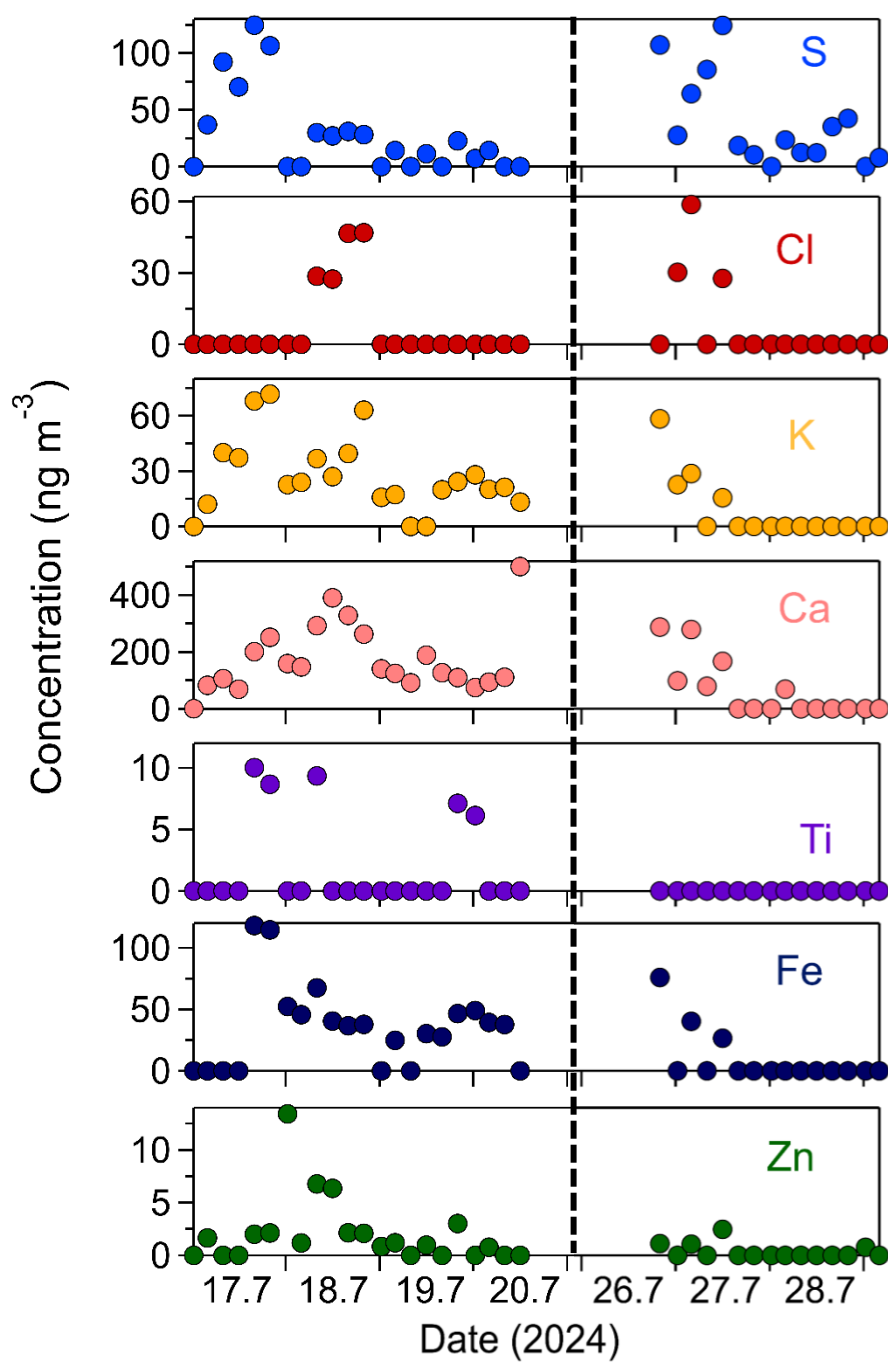

**Figure S8.** Time series of the corrected measurements for the elements detected by the Xact625i, in Patras, Greece, from 17 to 29 July 2024. Each point represents a 4-hour sample. The vertical dashed line indicates the time gap between the measurements.



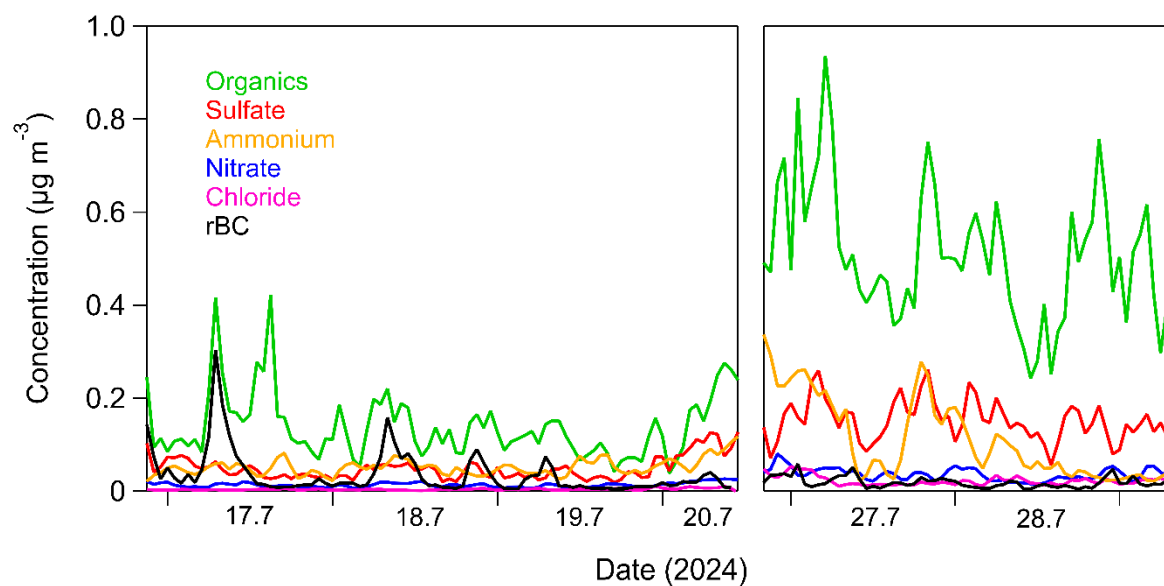

**Figure S9.** Hourly  $\text{PM}_{0.1}$  organics, sulfate, ammonium, nitrate and chloride measured by the HR-ToF-AMS and hourly  $\text{PM}_{0.1}$  refractory black carbon (rBC) measured by the SP2-XR, in Patras, Greece, from 17 to 29 July 2024.

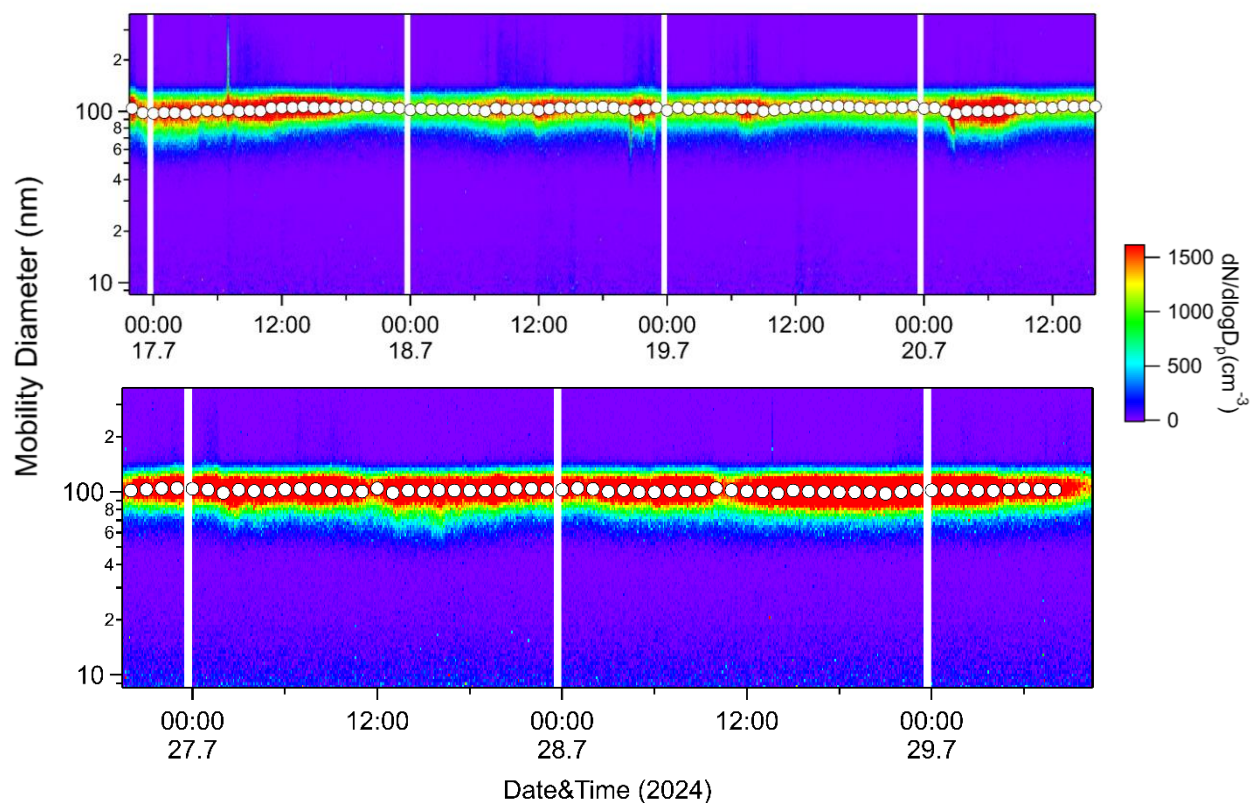

**Figure S10.** The monodisperse particle number size distributions measured by the SMPS-2 through time for the ambient measurements in Patras, Greece, from 17 to 29 July 2024. The white round points indicate the hourly mean diameter ( $d_{mo}$ ) of the peaks of the monodisperse distributions.

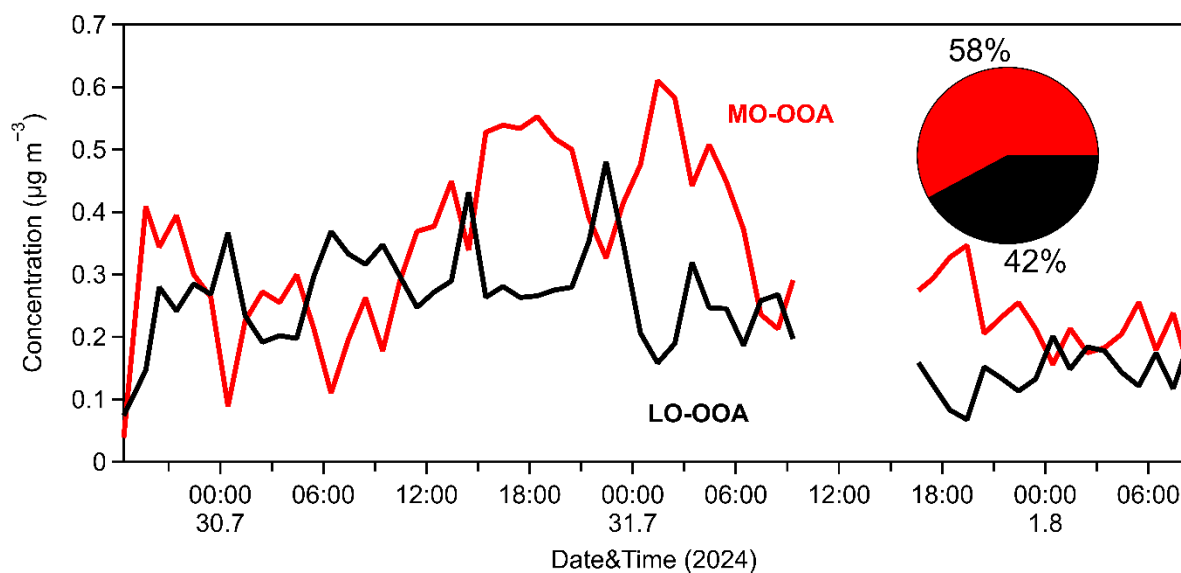

**Figure S11.** Hourly time-series of the PMF 2 factor solution for  $\text{PM}_{0.1}$  OA.

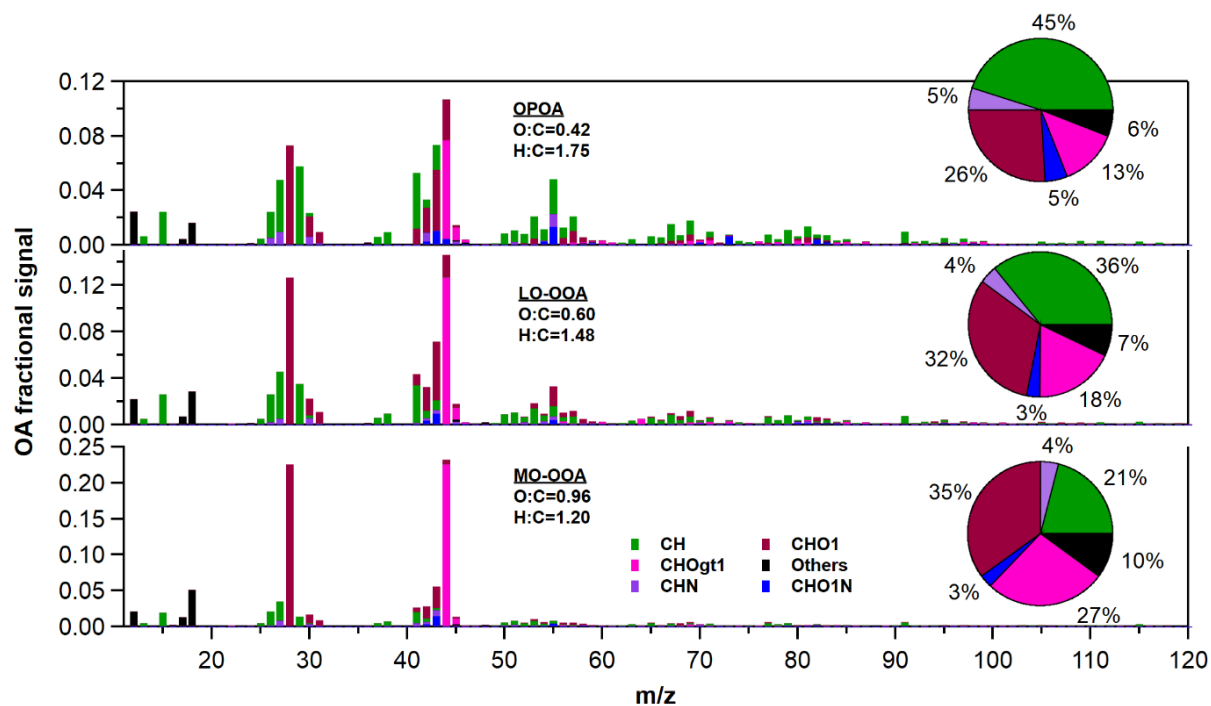

**Figure S12.** AMS spectra for PM<sub>0.1</sub> OA PMF factors. Inset pie charts represent the relative contributions of the families, as obtained by analysis of the high-resolution mass spectra.

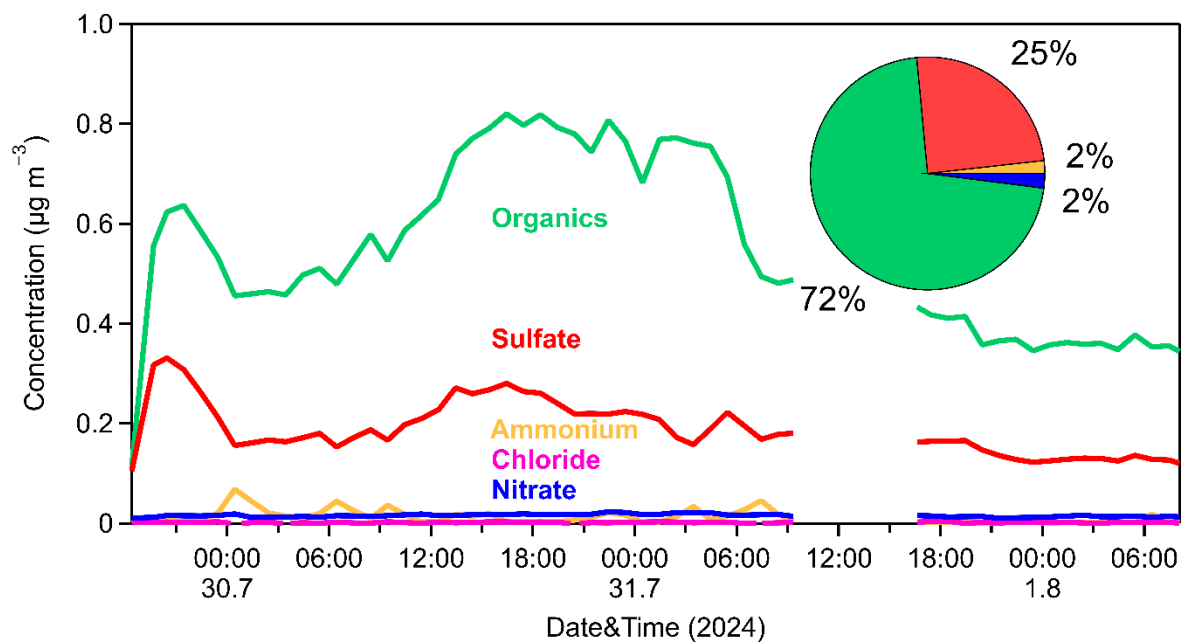

**Figure S13.** Time series of PM<sub>0.1</sub> AMS species during the 3-day period.

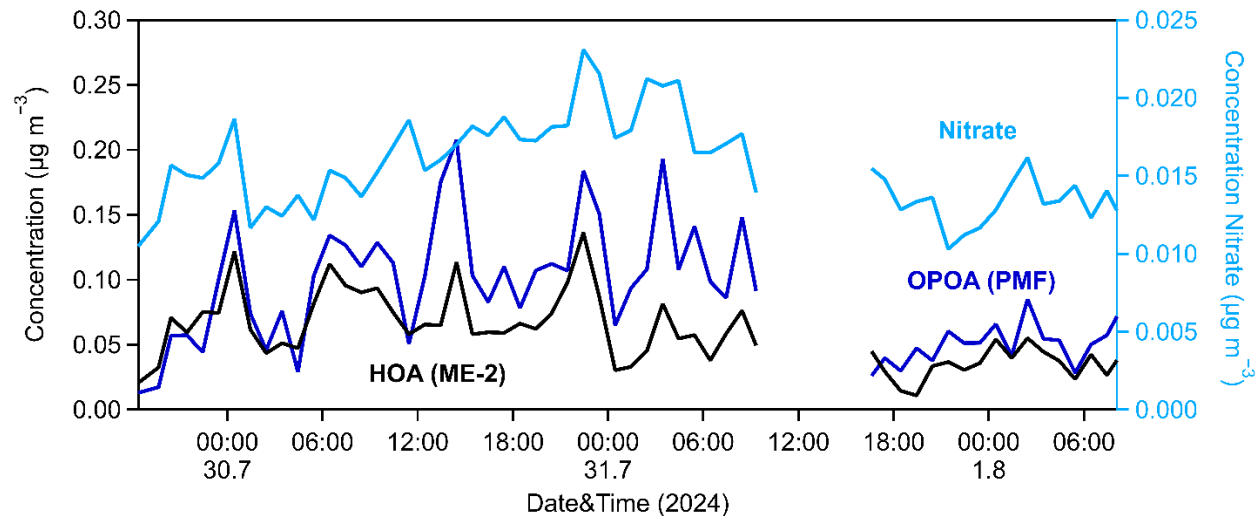

**Figure S14.** Time-series of nitrate (light blue) (right y-axis) and HOA/OPOA (black/blue) (left y-axis) for the three-day period.

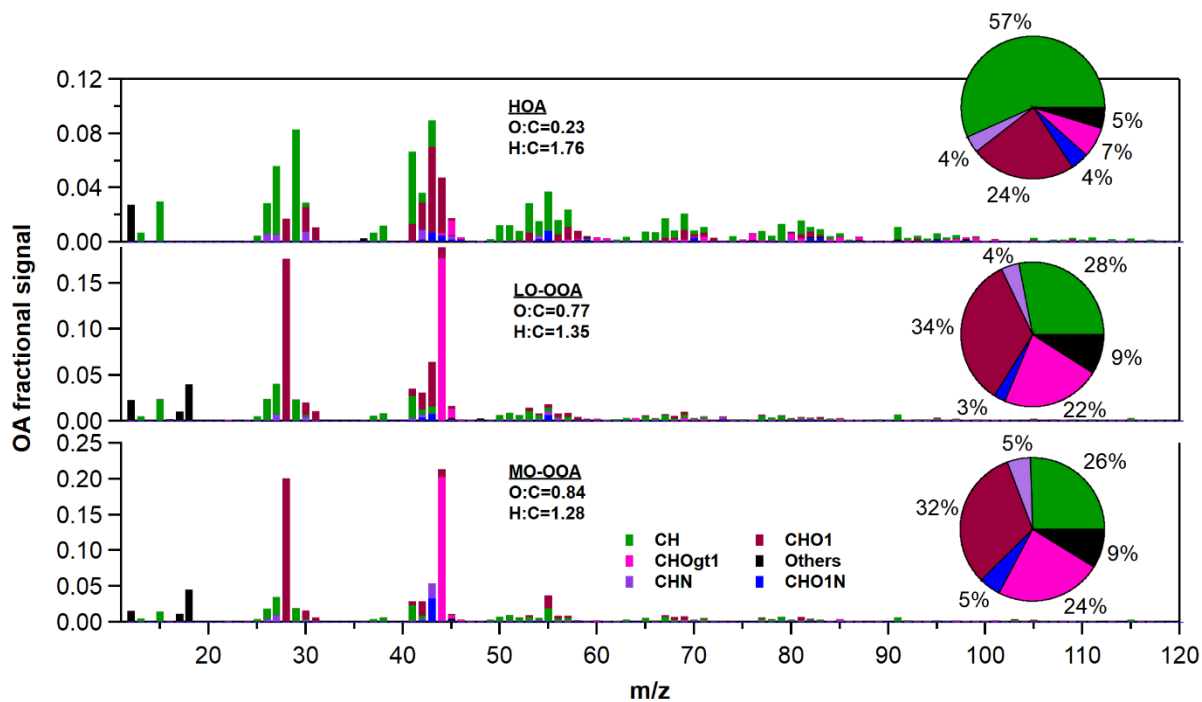

**Figure S15.** AMS spectra for PM<sub>0.1</sub> OA ME-2 factors. Inset pie charts represent the relative contributions of the families, as obtained by analysis of the high-resolution mass spectra.

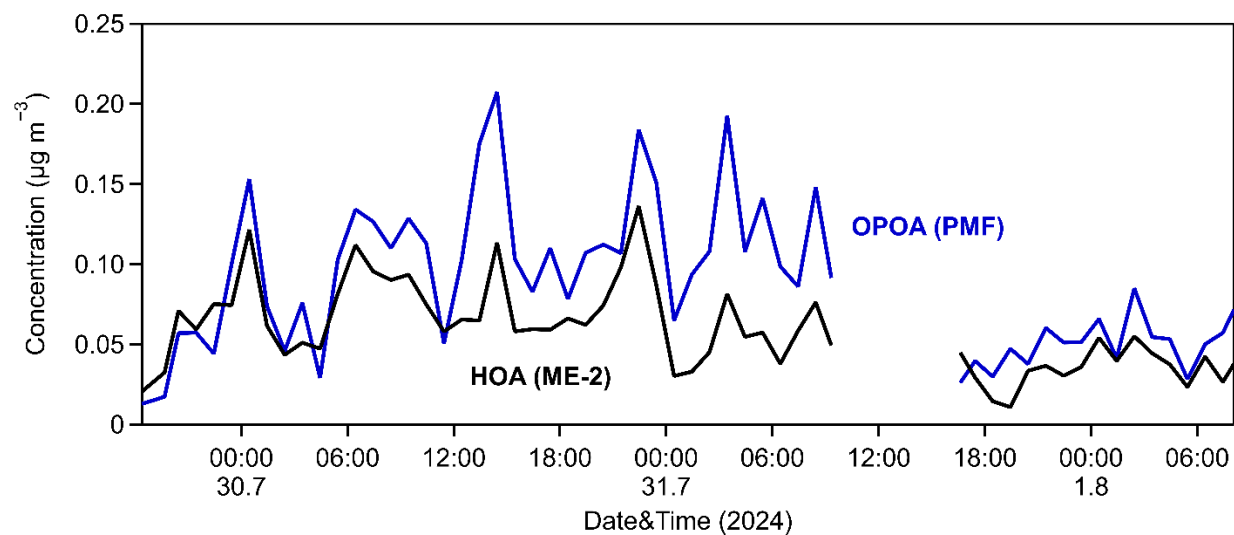

**Figure S16.** Time-series of HOA and OPOA for the three-day period.

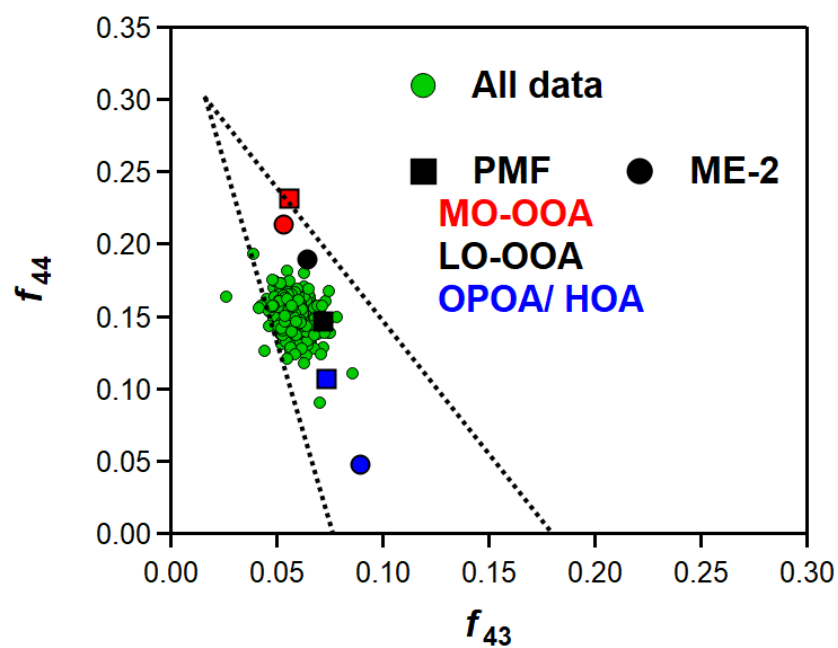

**Figure S17.**  $f_{44}$  vs.  $f_{43}$  plot for the PMF factors from this study.
